# Supplementary material
Source: MDPI journal article supplement (https://www.mdpi.com/2076-3417/13/8/5033)
Supplement: s1 [file s1]

## Supplementary material

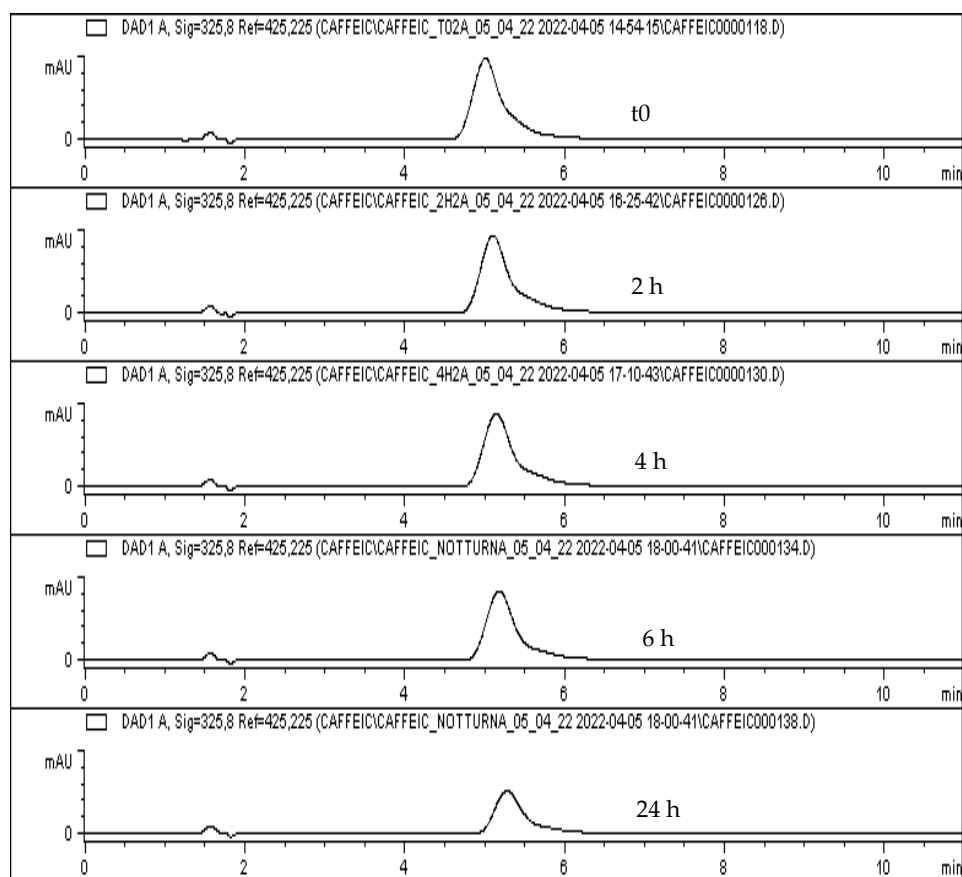

**Figure S1.** Chromatographic profiles obtained by RP-HPLC-DAD of caffeic acid using the dynamic intestinal model. The samples were injected at different digestion times. From top to bottom: undigested sample (t0), 2, 4, 6 and 24 h.

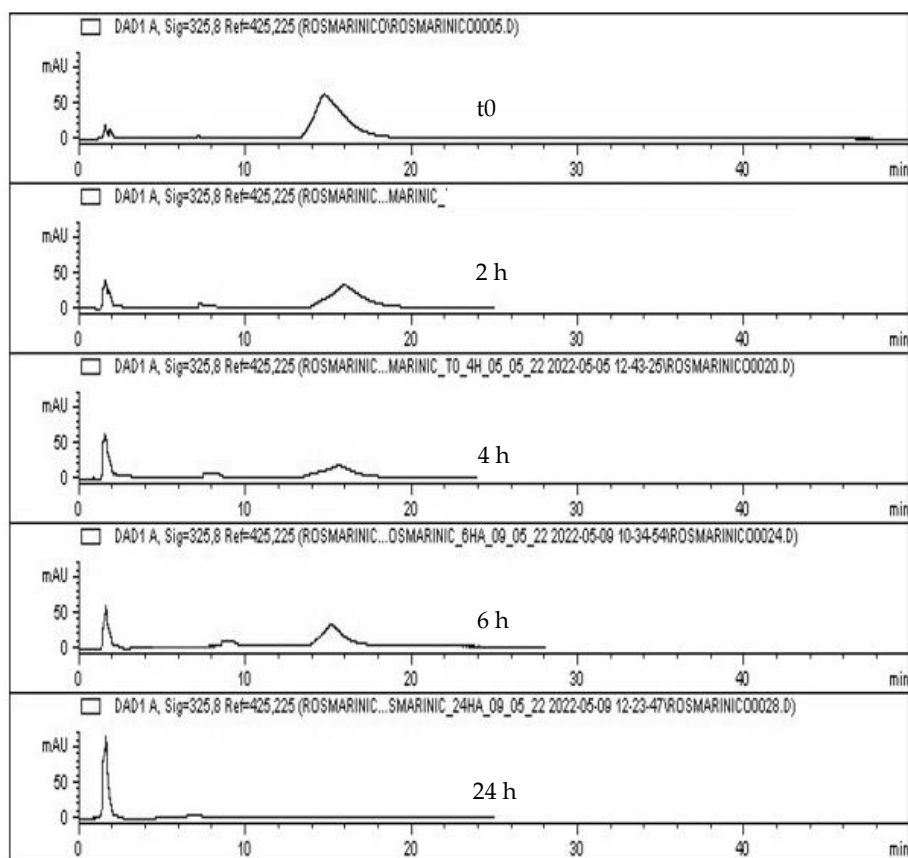

**Figure S2.** Chromatographic profiles obtained by RP-HPLC-DAD of rosmarinic acid using the dynamic intestinal model. The samples were injected at different digestion times. From top to bottom: undigested sample (t0), 2, 4, 6 and 24 h.

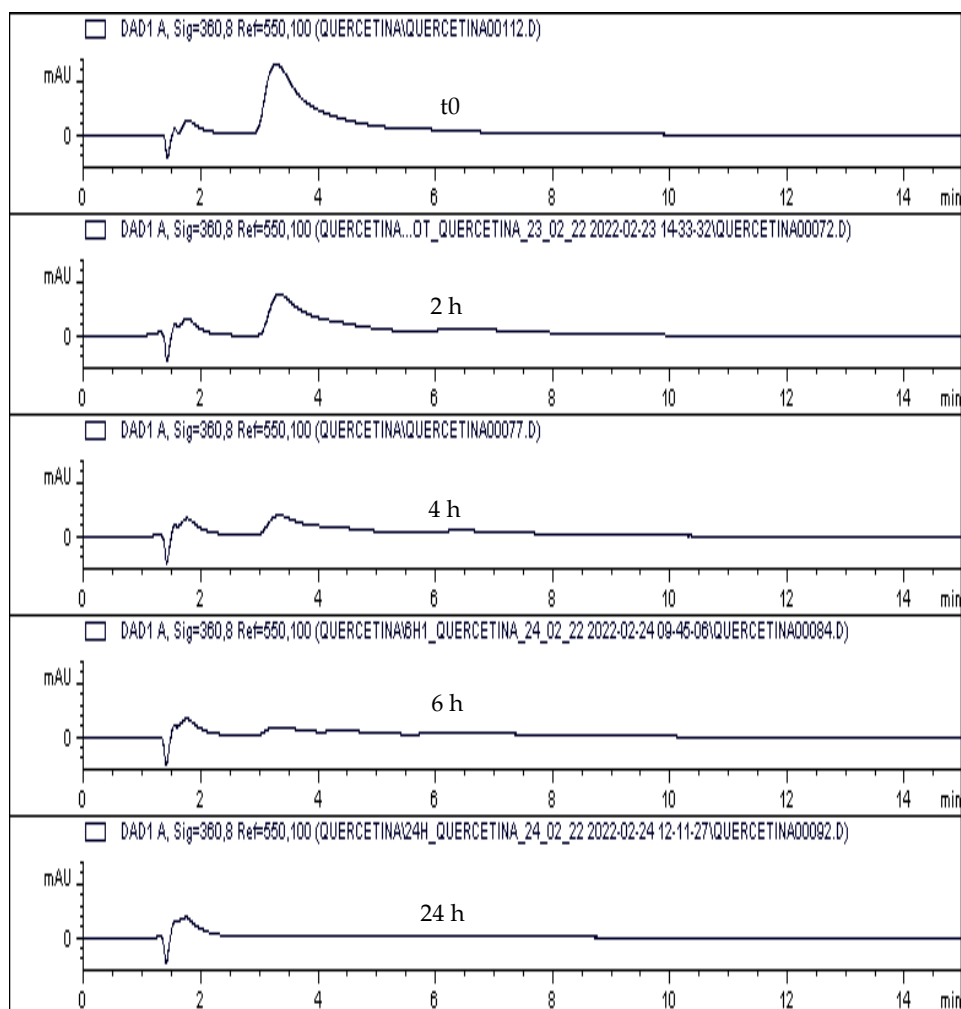

**Figure S3.** Chromatographic profiles obtained by RP-HPLC-DAD of quercetin using the dynamic intestinal model. The samples were injected at different digestion times. From top to bottom: undigested sample (t0), 2, 4, 6 and 24 h.

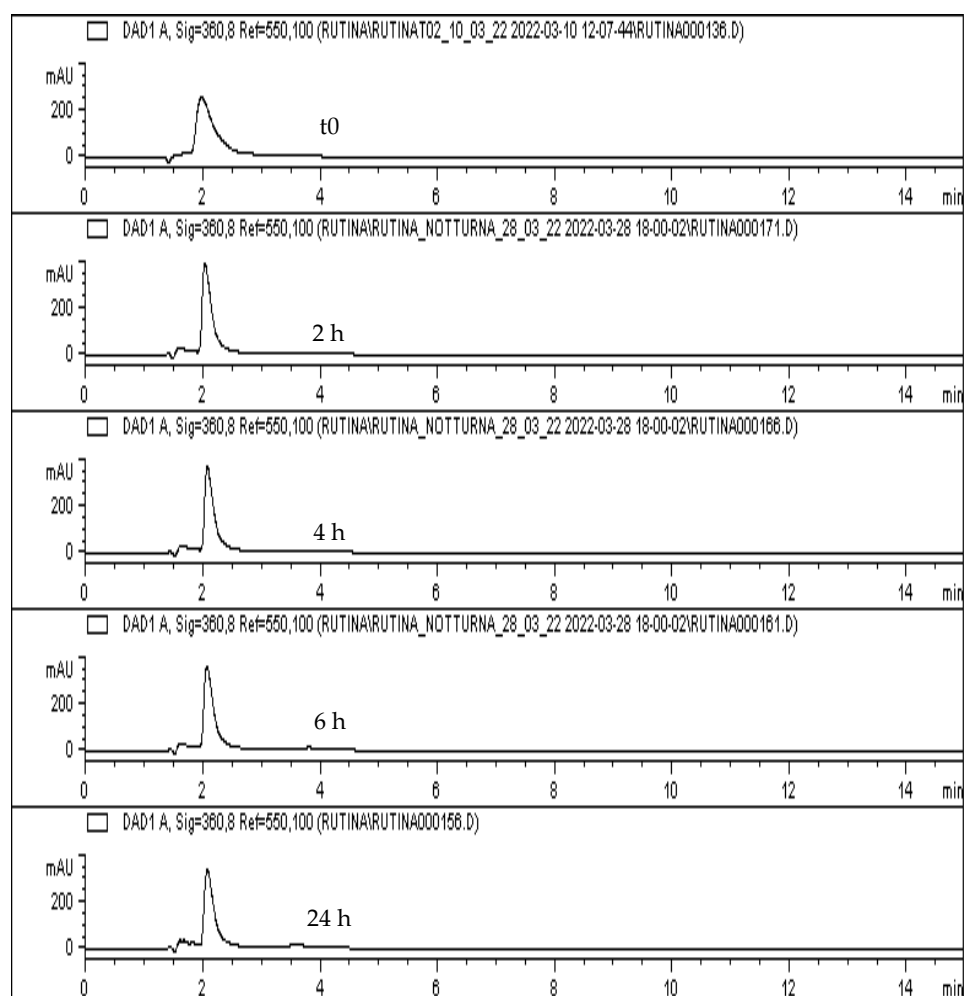

**Figure S4.** Chromatographic profiles obtained by RP-HPLC-DAD of rutin using the dynamic intestinal model. The samples were injected at different digestion times. From top to bottom: undigested sample (t0), 2, 4, 6 and 24 h.
